# Supplementary material for: Morphological and physiological insights into coordination of anthocyanin deposition and cuticle formation in leaf development of Rosa chinensis
Source: Research Square preprint supplement (doi:10.21203/rs.3.rs-7371935/v1), 2025-10-27
Supplement: Supplementary file 1 [file c4edf4e5ef1bfc9f7e38a050.xlsx]

## Sheet: Sheet1
Supplement Table 1: The percentage of various components in cuticular wax
	Retention time (minutes)	Name	Molecular weight (amu)	CAS number	S1 (μg/cm²)	S2 (μg/cm²)	S3 (μg/cm²)	S4 (μg/cm²)
Alkanol	13.181	Hexane, 3,3-dimethyl-	114.141	000563-16-6	2.6052 ± 0.0503	2.3391 ± 0.0899	1.9165±0.1484	3.9246±0.0379
	15.794	Decane	142.172	000124-18-5	4.9114±0.1731	4.6390±0.1289	3.8649±0.3100	6.9395±0.1489
	19.255	Decane, 1-iodo-	268.069	002050-77-3	1.7942±0.0648	1.8342±0.0245	1.4524±0.0881	2.8866±0.1430
	17.052	Undecane	156.188	001120-21-4	4.1015±0.0316	4.0101±0.0533	3.2305±0.1735	6.4633±0.2308
	13.661	Dodecane	170.203	000112-40-3	3.5845±0.1048	3.4015±0.0706	2.8046±0.2814	5.777±0.2149
	23.361	2-Bromo dodecane	248.114	013187-99-0	2.1242±0.0866	2.0253±0.0233	1.5932±0.1029	3.7162±0.1965
	30.212	Decane, 3,8-dimethyl-	170.203	017312-55-9	2.1217±0.0380	2.4322±0.1445	1.9869±0.1177	4.3366±0.2642
	10.777	Undecane, 3,6-dimethyl-	184.219	017301-28-9	2.0701±0.0501	2.0070±0.0998	1.7979±0.0990	3.6513±0.0882
	17.913	Tridecane, 1-iodo-	310.116	035599-77-0	10.6585±0.295	11.9027±0.1993	9.7077±0.8928	22.4018±1.4441
	16.468	Tridecane	184.219	000629-50-5	2.0910±0.0349	2.0465±0.0413	1.7043±0.0926	3.3212±0.1667
	19.47	Dodecane, 2-methyl-	184.219	001560-97-0	2.1644±0.0730	2.2643±0.0257	1.7698±0.1304	3.4216±0.3344
	20.332	Nonane, 5-butyl-	184.219	017312-63-9	1.7897±0.0436	2.1141±0.1043	1.9064±0.0290	3.0827±0.3017
	14.592	Tridecane, 2-methyl-	198.235	001560-96-9	2.0975±0.0846	1.9242±0.0187	1.5796±0.0856	3.2313±0.1255
	15.509	Tetradecane	198.235	000629-59-4	2.2263±0.0656	2.2277±0.0657	1.7191±0.1176	3.3006±0.1027
	12.487	Dodecane, 2,6,11-trimethyl-	212.25	031295-56-4	7.9342±0.2399	7.2842±0.1924	5.9703±0.6209	12.4672±0.2606
	26.815	Tridecane, 6-propyl-	226.266	055045-10-8	2.9266±0.0394	2.9082±0.0415	2.3828±0.1783	5.5154±0.2938
	23.167	Hexadecane	226.266	000544-76-3	1.9953±0.0590	1.9901±0.0548	1.5302±0.1120	3.4426±0.1572
	20.519	Tetradecane, 2,6,10-trimethyl-	240.282	014905-56-7	1.8166±0.0319	2.8083±0.0352	6.3870±0.6428	4.7738±0.1371
	22.875	Heptadecane	240.282	000629-78-7	6.6980±0.2210	6.9224±0.1919	5.2321±0.6528	12.1688±1.024
	22.666	Hexadecane, 5-butyl-	282.329	006912-07-8	2.1099±0.0610	2.0468±0.0791	1.6475±0.1223	3.4769±0.2072
	12.834	Hexadecane, 7,9-dimethyl-	254.297	021164-95-4	2.0541±0.0537	1.8909±0.0341	1.5754±0.1023	3.5150±0.3425
	16.072	Octadecane	254.297	000593-45-3	3.7904±0.2179	3.4262±0.0985	2.5677±0.2534	5.0882±0.1138
	18.99	Heptadecane, 8-methyl-	254.297	013287-23-5	4.0191±0.1127	4.0962±0.0818	3.3782±0.3601	6.6453±0.2101
	17.698	Tridecane, 7-hexyl-	268.313	007225-66-3	2.5604±0.0801	2.6777±0.0554	2.0311±0.1691	4.1315±0.1660
	17.761	Octadecane, 5-methyl-	268.313	025117-35-5	2.8988±0.1042	2.6873±0.0459	1.9492±0.1399	4.0900±0.1369
	22.569	Nonadecane	268.313	000629-92-5	2.4462±0.0731	2.5766±0.0289	1.9368±0.1018	4.4535±0.3368
	12.056	10-Methylnonadecane	282.329	056862-62-5	5.5552±0.1949	5.1292±0.1659	4.2816±0.4011	8.9241±0.1341
	26.578	Eicosane, 10-methyl-	296.344	054833-23-7	2.9205±0.1084	2.2828±0.1164	2.0051±0.1079	4.4304±0.4221
	34.257	Docosane, 11-decyl-	450.516	055401-55-3	1.9146±0.0698	2.4485±0.0187	1.9638±0.1435	4.3593±0.2838
	26.676	Heneicosane	296.344	000629-94-7	2.7218±0.1358	2.5663±0.1296	2.0515±0.2276	4.5248±0.1623
	40.42	Tetracosane	338.391	000646-31-1	9.0189±0.2850	11.9247±0.8109	8.4502±1.1854	14.7125±0.9668
	29.504	Pentacosane	352.68	000629-99-2	2.5489±0.0724	2.7533±0.0480	2.2372±0.2307	3.7826±0.0741
	29.99	Hexacosane	366.423	000630-01-3	2.3614±0.0583	2.2919±0.0832	1.8191±0.1480	3.9491±0.2083
	35.111	Heptacosane	380.73	000593-49-7	2.1424±0.1161	2.0279±0.1164	1.6348±0.1405	3.5997±0.1094
	27.19	2-methyloctacosane	408.47	1000376-72-8	1.8006±0.0479	1.7482±0.0593	1.3596±0.0922	2.8123±0.1371
Saturated fatty acid	11.91	Decane, 5-propyl-	184.219	017312-62-8	3.4043±0.1615	3.3462±0.1577	2.9705±0.3725	5.5813±0.2296
	28.045	n-Hexadecanoic acid	256.24	000057-10-3	25.1660±1.0407	22.1468±0.7160	18.7230±1.0910	37.8350±1.6475
	31.804	Octadecanoic acid	284.272	000057-11-4	6.3106±0.2370	6.1587±0.1957	4.8506±0.3099	9.6965±0.5484
Unsaturated fatty acid	47.07	Vitamin E	430.381	000059-02-9		3.7197±0.2240	3.7639±0.1961	36.0597±1.2598
	31.408	9,12-Octadecadienoic acid (Z,Z)-	280.24	000060-33-3	6.8658±0.3622	6.6870±0.4323	4.8532±0.3785	13.5862±0.2704
Fatty acid derivatives	32.165	9-Octadecenamide, (Z)-	281.272	000301-02-0	6.3150±0.1682	6.1765±0.0629	4.7434±0.4628	10.0180±0.9981
	41.824	13-Octadecenamide, (Z)-	281.272	003061-72-1	78.4952±1.7410	54.9534±21.1116	6.7275±0.2817	25.9314±2.6821
	35.32	9-Octadecenamide, (Z)-	281.272	000301-02-0	10.6225±0.2044	12.8990±0.2303	9.1989±1.0947	21.5173±0.8725
Ester	22.333	Carbonic acid, eicosyl vinyl ester	368.329	1000382-54-3	2.9833±0.0938	2.9975±0.0375	2.2926±0.1945	5.1740±0.3546
	25.807	2-Propenoic acid, 3-(4-hydroxy-3-methoxyphenyl)-, methyl ester	208.074	002309-07-1	3.1067±0.1021	2.9540±0.1873	2.2843±0.2621	5.6376±0.2032
	30.616	9,12-Octadecadienoic acid, methyl ester	294.256	000112-63-0	1.8389±0.0630	1.8638±0.0055	1.6259±0.2069	2.9234±0.0828
	31.171	Methyl stearate	298.287	000112-61-8	4.2316±0.0794	4.0242±0.1043	3.0649±0.1468	6.5425±0.2261
	40.761	Octadecanoic acid, 2-hydroxy-1-(hydroxymethyl)ethyl ester	358.308	000621-61-4	20.4988±1.8500	25.3447±0.7368	29.0066±3.9716	60.8705±2.0912
	37.648	Hexadecanoic acid, 2-hydroxy-1-(hydroxymethyl)ethyl ester	330.277	023470-00-0	47.3879±1.8727	56.1149±2.4183	57.7781±6.0520	117.3370±4.5475
	37.842	Methyl 20-methyl-heneicosanoate	354.35	1000336-47-4	4.3450±0.2829	6.3401±0.2461	6.4795±0.6709	12.4974±0.9938
	24.973	Methoxyacetic acid, 2-tridecyl ester	272.235	1000282-04-5	1.6926±0.0209		1.3137±0.0289	2.4984±0.0807
	35.778	Hexanedioic acid, bis(2-ethylhexyl) ester	370.308	000103-23-1	14.2177±0.6573	20.2732±1.0685	14.5696±1.5251	35.4359±2.9133
	37.14	6,9,12-Octadecatrienoic acid, methyl ester	292.24	002676-41-7	5.2413±0.1790	3.4100±0.2477	2.9876±0.0594	8.1893±0.955
	27.357	Pentadecanoic acid, 14-methyl-, methyl ester	270.256	005129-60-2	7.9460±0.1717	7.4105±0.0625	5.7899±0.6645	12.7739±0.4898
Olefin	43.227	1-Hexacosene	364.407	018835-33-1	3.0797±0.1609	21.5274±0.7051	14.7132±1.7226	22.1314±1.3739
	37.411	9-Tricosene, (Z)-	322.36	027519-02-4	5.9885±0.5107	3.8050±0.0814	3.0845±0.1674	6.8783±0.3719
	28.663	3-Eicosene, (E)-	280.313	074685-33-9	1.6161±0.0416	2.0700±0.0913	1.3657±0.0639	3.3665±0.0520
	26.106	Neophytadiene	278.297	000504-96-1	2.5602±0.0826	2.8146±0.0347	2.1077±0.1081	8.5786±0.5587
Phenol	11.097	Benzaldehyde, 3,5-dimethyl-	134.073	005779-95-3	4.9179±0.1905	4.1408±0.2616	3.5486±0.2827	9.4506±0.6561
	18.365	2,4-Di-tert-butylphenol	206.167	000096-76-4	34.0599±0.9716	29.9973±1.1920	23.9128±2.9961	48.2609±3.6059
	36.376	Phenol, 2,2'-methylenebis[6-(1,1-dimethylethyl)-4-methyl-	340.24	000119-47-1	6.8691±0.3974	3.1221±0.0321	2.7552±0.1491	5.6640±0.6166
Other	40.212	9-Eicosyne	278.297	071899-38-2	2.2581±0.0826		1.8708±0.0744	4.5789±0.2669
	21.464	n-Docosanol	326.6	031295-56-4	2.9581±0.0346			5.0805±0.1048
	26.488	3,7,11,15-Tetramethyl-2-hexadecen-1-ol	296.308	102608-53-7	3.4899±0.1322	3.9845±0.1012	2.8946±0.1346	6.8375±0.4411

## Sheet: raw data of cuticular wax
				S1-1		S1-2		S1-3		S1-4		S2-1		S2-2		S2-3		S3-1		S3-2		S3-3		S4-1		S4-2		S4-3		S4-4
				Leaf area (cm²)	Dissolution volume (mL)	Leaf area (cm²)	Dissolution volume (mL)	Leaf area (cm²)	Dissolution volume (mL)	Leaf area (cm²)	Dissolution volume (mL)	Leaf area (cm²)	Dissolution volume (mL)	Leaf area (cm²)	Dissolution volume (mL)	Leaf area (cm²)	Dissolution volume (mL)	Leaf area (cm²)	Dissolution volume (mL)	Leaf area (cm²)	Dissolution volume (mL)	Leaf area (cm²)	Dissolution volume (mL)	Leaf area (cm²)	Dissolution volume (mL)	Leaf area (cm²)	Dissolution volume (mL)	Leaf area (cm²)	Dissolution volume (mL)	Leaf area (cm²)	Dissolution volume (mL)
				3.14	0.42	3.41	0.42	3.44	0.42	3.51	0.42	3.6	0.42	3.42	0.42	3.64	0.42	4.4	0.42	4.18	0.42	4.09	0.42	2.28	0.42	2.3	0.42	2.3	0.42	2.38	0.42
Retention time (min)	Name	Molecular weight (amu)	CAS number	Concentration（μg/mL）	Sample content（μg/cm²)	Concentration（μg/mL）	Sample content（μg/cm²)	Concentration（μg/mL）	Sample content（μg/cm²)	Concentration（μg/mL）	Sample content（μg/cm²)	Concentration（μg/mL）	Sample content（μg/cm²)	Concentration（μg/mL）	Sample content（μg/cm²)	Concentration（μg/mL）	Sample content（μg/cm²)	Concentration（μg/mL）	Sample content（μg/cm²)	Concentration（μg/mL）	Sample content（μg/cm²)	Concentration（μg/mL）	Sample content（μg/cm²)	Concentration（μg/mL）	Sample content（μg/cm²)	Concentration（μg/mL）	Sample content（μg/cm²)	Concentration（μg/mL）	Sample content（μg/cm²)	Concentration（μg/mL）	Sample content（μg/cm²)
10.777	Undecane, 3,6-dimethyl-	184.219	017301-28-9	16.5417	2.21258	16.7065	2.05769	16.2248	1.98093	16.9586	2.02924	18.5408	2.16309	16.5849	2.03674	15.7846	1.8213	17.8481	1.70368	17.8049	1.78901	18.5127	1.90106	20.0814	3.69921	20.4814	3.74007	19.381	3.53914	20.5525	3.62691
11.097	Benzaldehyde, 3,5-dimethyl-	134.073	005779-95-3	40.1443	5.36962	41.1018	5.06239	36.7902	4.49183	39.6782	4.74782	39.9603	4.66204	31.9189	3.91987	33.2855	3.84063	34.7933	3.32118	34.4296	3.45943	37.6382	3.86504	51.0267	9.39965	52.8426	9.64952	55.6567	10.1634	48.6751	8.58973
11.91	Decane, 5-propyl-	184.219	017312-62-8	28.0587	3.75307	28.4128	3.49952	27.7411	3.38699	24.8852	2.97772	30.7117	3.58304	27.7511	3.40803	26.4116	3.0475	28.3822	2.70921	27.9197	2.80533	33.0806	3.39703	30.7364	5.66196	31.2227	5.70154	31.3387	5.72273	29.688	5.23906
12.056	10-Methylnonadecane	282.329	056862-62-5	44.9796	6.01638	46.3402	5.70759	44.0204	5.37459	42.808	5.12233	46.0829	5.37634	42.321	5.19732	41.7213	4.814	42.3861	4.04594	40.3477	4.05407	46.2048	4.74475	47.5972	8.76791	49.7254	9.08028	49.1483	8.97491	50.2825	8.87338
12.487	Dodecane, 2,6,11-trimethyl-	212.25	031295-56-4	63.1341	8.44469	66.5529	8.19713	63.2542	7.7229	61.609	7.37202	63.5297	7.4118	61.3538	7.53467	59.8519	6.90599	60.6405	5.78841	54.3463	5.46064	64.8733	6.6618	65.9112	12.1415	68.7467	12.5537	67.9649	12.411	72.3199	12.7623
12.834	Hexadecane, 7,9-dimethyl-	254.297	021164-95-4	16.486	2.20513	16.6939	2.05614	16.2626	1.98555	16.4612	1.96972	15.9444	1.86018	15.9525	1.95908	16.0637	1.8535	15.8689	1.51476	15.1077	1.518	16.4913	1.69349	16.5599	3.05052	20.4757	3.73905	20.8318	3.80407	19.6426	3.46634
13.181	Hexane, 3,3-dimethyl-	114.141	000563-16-6	20.4423	2.73431	21.3522	2.62989	20.9156	2.55364	20.9191	2.50314	20.0953	2.34445	20.2932	2.49214	18.8996	2.18073	18.8375	1.79813	18.5938	1.86828	20.2845	2.083	21.0436	3.87644	21.6661	3.95642	21.6492	3.95333	22.1696	3.91228
13.661	Dodecane	170.203	000112-40-3	28.5576	3.8198	29.9037	3.68316	28.6015	3.49205	27.9395	3.34318	29.51	3.44283	28.4821	3.4978	28.2869	3.26387	27.2156	2.59785	26.7807	2.69088	30.4317	3.12501	29.8421	5.49722	32.7751	5.98502	32.2981	5.89791	32.458	5.72789
14.592	Tridecane, 2-methyl-	198.235	001560-96-9	17.339	2.31922	17.3211	2.13339	16.4032	2.00271	16.1694	1.9348	16.6884	1.94698	15.786	1.93863	16.3542	1.88703	15.7523	1.50363	15.5553	1.56297	16.2852	1.67231	17.1439	3.15809	18.3505	3.35096	18.1979	3.3231	17.5269	3.09297
15.509	Tetradecane	198.235	000629-59-4	17.8237	2.38406	18.5469	2.28437	17.4155	2.12632	17.6384	2.11058	18.8466	2.19877	19.1616	2.35318	18.4692	2.13107	16.9445	1.61743	16.839	1.69195	17.9945	1.84785	17.1124	3.15228	18.5567	3.38861	18.2069	3.32473	18.9088	3.33685
15.794	Decane	142.172	000124-18-5	36.6497	4.90218	38.5293	4.74555	37.6864	4.60124	45.1016	5.39677	37.559	4.38188	38.6895	4.75135	41.4582	4.78364	37.8704	3.6149	37.5013	3.76808	41.0141	4.21171	37.8793	6.97776	38.8057	7.08626	38.1242	6.96181	38.1484	6.73207
16.072	Octadecane	254.297	000593-45-3	31.7943	4.25274	32.8272	4.04323	27.0081	3.2975	29.8208	3.5683	28.757	3.35498	26.8945	3.30284	31.3802	3.62079	24.4496	2.33382	25.2025	2.53231	27.6253	2.83683	26.8189	4.94032	27.8875	5.09251	27.942	5.10244	29.5664	5.21759
16.468	Tridecane	184.219	000629-50-5	16.2964	2.17978	17.1543	2.11284	16.5968	2.02635	17.0917	2.04516	16.9299	1.97515	17.2471	2.11807	17.7342	2.04625	17.3304	1.65427	16.3955	1.6474	17.6369	1.81113	17.5625	3.2352	19.3799	3.53893	18.3722	3.35492	17.8823	3.1557
17.052	Undecane	156.188	001120-21-4	30.8186	4.12224	32.5452	4.0085	33.7847	4.12488	34.6844	4.15027	33.9349	3.95907	33.5217	4.1167	34.2719	3.95445	31.9255	3.04743	32.3597	3.25145	33.0377	3.39263	33.2522	6.12541	36.2844	6.62584	36.1157	6.59505	36.8732	6.50704
17.698	Tridecane, 7-hexyl-	268.313	007225-66-3	20.467	2.73762	21.5481	2.65402	19.9314	2.43349	20.1937	2.41633	22.6622	2.64392	22.6861	2.78602	22.5597	2.60304	20.1921	1.92743	19.3042	1.93966	21.6799	2.2263	21.179	3.9014	22.9328	4.18772	22.6863	4.14272	24.3333	4.2941
17.761	Octadecane, 5-methyl-	268.313	025117-35-5	19.9082	2.66288	25.0814	3.08921	25.049	3.05831	23.272	2.78468	22.529	2.62838	22.6184	2.7777	23.0163	2.65573	19.3096	1.84319	18.8756	1.89659	20.5262	2.10783	23.0395	4.24412	21.8357	3.98739	22.8118	4.16563	22.4553	3.9627
17.913	Tridecane, 1-iodo-	310.116	035599-77-0	84.5659	11.3114	88.9905	10.9607	84.9292	10.3693	83.5098	9.99263	105.119	12.2639	94.2634	11.5762	102.856	11.868	91.6857	8.75181	98.0447	9.85138	102.444	10.5199	119.815	22.0713	127.46	23.2752	130.051	23.7485	116.235	20.5121
18.365	2,4-Di-tert-butylphenol	206.167	000096-76-4	275.546	36.8565	267.726	32.975	277.348	33.8622	271.991	32.5459	244.744	28.5535	236.764	29.0763	280.472	32.3621	217.7	20.7804	240.918	24.2071	260.503	26.7509	263.071	48.4604	281.652	51.4322	273.719	49.9834	244.615	43.1674
18.99	Heptadecane, 8-methyl-	254.297	013287-23-5	32.1281	4.29739	33.3095	4.10264	31.7232	3.87319	31.7831	3.80311	34.2966	4.00127	34.6803	4.25899	34.9131	4.02844	31.035	2.96243	35.7234	3.58943	34.8904	3.58288	34.8868	6.42651	37.5139	6.85036	37.2262	6.79782	36.8701	6.50649
19.255	Decane, 1-iodo-	268.069	002050-77-3	14.7267	1.96981	14.5596	1.79326	14.3617	1.75346	13.8745	1.6602	15.3042	1.78549	15.1006	1.85445	16.1436	1.86273	14.2577	1.36096	14.5257	1.45952	14.9647	1.53671	14.9968	2.76258	16.3548	2.98652	16.6045	3.03212	15.6686	2.76505
19.47	Dodecane, 2-methyl-	184.219	001560-97-0	17.7781	2.37796	17.2401	2.12341	17.2557	2.1068	17.1257	2.04923	18.9941	2.21598	18.5122	2.27343	19.9644	2.30358	17.2734	1.64882	17.4448	1.75283	18.579	1.90787	17.871	3.29202	20.1179	3.67369	20.3284	3.71215	17.048	3.00847
20.332	Nonane, 5-butyl-	184.219	017312-63-9	14.2195	1.90198	14.7026	1.81087	14.279	1.74337	14.2275	1.70244	19.4112	2.26464	17.6215	2.16404	16.5851	1.91366	19.6237	1.87317	19.104	1.91954	18.7599	1.92645	17.8964	3.29671	17.9761	3.28259	16.9831	3.10126	15.0181	2.65025
20.519	Tetradecane, 2,6,10-trimethyl-	240.282	014905-56-7	14.1073	1.88697	14.2612	1.75651	14.4898	1.7691	15.4926	1.85382	23.6747	2.76205	22.6826	2.78559	24.9366	2.8773	62.4679	5.96285	60.4278	6.07169	69.3995	7.1266	25.7055	4.73522	26.7196	4.87923	26.7481	4.88443	26.0447	4.59613
21.2	Octadecane, 1-iodo-	380.194	000629-93-6	22.0294	2.94661	21.8321	2.68899	21.7457	2.655	21.0947	2.52415													26.2113	4.82839	26.6786	4.87175	26.0752	4.76155	24.8237	4.38065
21.464	n-Docosanol	326.6	031295-56-4	22.6815	3.03383	23.4134	2.88376	24.5443	2.99669	24.3887	2.9183													27.192	5.00906	28.0623	5.12442	28.5159	5.20726	28.2265	4.98115
22.333	Carbonic acid, eicosyl vinyl ester	368.329	1000382-54-3	23.8329	3.18784	24.6484	3.03588	24.3527	2.97329	22.8682	2.73637	25.67	2.99483	24.9483	3.06382	25.4266	2.93384	22.5499	2.15249	22.0016	2.21069	24.4874	2.5146	30.8946	5.69111	27.8166	5.07956	27.5904	5.03826	27.6929	4.88698
22.569	Nonadecane	268.313	000629-92-5	19.2419	2.57376	20.6676	2.54557	19.7477	2.41106	18.8413	2.25451	21.6414	2.52483	21.0115	2.58035	22.7465	2.6246	19.6899	1.87949	18.6756	1.8765	20.005	2.0543	25.8927	4.76971	25.3794	4.63449	24.1479	4.40963	22.6666	4
22.666	Hexadecane, 5-butyl-	282.329	006912-07-8	17.0557	2.28133	17.0097	2.09504	16.9467	2.06907	16.6671	1.99436	17.5242	2.04449	17.7911	2.18487	16.5619	1.91098	16.2185	1.54813	16.0262	1.61028	17.373	1.78403	20.5551	3.78647	18.6143	3.39914	18.4184	3.36337	19.0327	3.35872
22.875	Heptadecane	240.282	000629-78-7	53.6432	7.1752	55.7563	6.86735	54.2253	6.62053	51.2207	6.12898	60.943	7.11002	57.9659	7.11863	56.6687	6.5387	49.6104	4.73554	49.6539	4.98915	58.1517	5.97157	73.8951	13.6123	65.5995	11.979	65.1049	11.8887	63.4401	11.1953
23.167	Hexadecane	226.266	000544-76-3	16.123	2.15658	16.2797	2.00513	15.4596	1.88751	16.1451	1.93189	17.0163	1.98523	16.997	2.08735	16.4476	1.8978	15.4683	1.47652	14.4834	1.45527	16.1548	1.65893	19.4394	3.58095	19.0182	3.47289	19.1648	3.49966	18.2301	3.21708
23.361	2-Bromo dodecane	248.114	013187-99-0	17.6383	2.35927	17.4553	2.14992	16.3023	1.9904	16.6898	1.99707	17.0252	1.98627	16.8297	2.06681	17.5302	2.02272	15.7933	1.50754	15.5719	1.56464	16.6261	1.70733	19.4436	3.58172	21.5232	3.93032	20.988	3.8326	19.948	3.52023
23.98	Heptadecane, 2-methyl-	254.297	001560-89-0	13.3556	1.78642	13.483	1.66067	14.2161	1.73568	13.4177	1.60554
24.973	Methoxyacetic acid, 2-tridecyl ester	272.235	1000282-04-5	13.1118	1.75381	13.5151	1.66462	13.7992	1.68479	13.9329	1.66719							13.4724	1.28601	13.0519	1.31143	13.0857	1.34376	13.7989	2.54191	13.8885	2.53616	13.8985	2.53799	13.4722	2.37745
25.807	2-Propenoic acid, 3-(4-hydroxy-3-methoxyphenyl)-, methyl ester	208.074	002309-07-1	24.6175	3.29279	26.0315	3.20622	25.4302	3.10485	23.5909	2.82285	26.6214	3.10583	25.8511	3.1747	22.373	2.5815	21.5046	2.05271	22.208	2.23143	25.0152	2.5688	31.5669	5.81496	30.6741	5.60136	31.5886	5.76836	30.4049	5.36557
26.106	Neophytadiene	278.297	000504-96-1	19.2571	2.5758	20.6976	2.54926	22.6038	2.75977	19.6881	2.35584	23.7237	2.76776	23.4709	2.88239	24.2119	2.79368	21.4048	2.04319	22.2187	2.23251	19.9371	2.04733	49.778	9.16964	47.3614	8.64861	47.5028	8.67442	44.3222	7.82156
26.488	3,7,11,15-Tetramethyl-2-hexadecen-1-ol	296.308	102608-53-7	25.0275	3.34762	26.5866	3.2746	31.6788	3.86776	28.9976	3.4698	35.7685	4.17299	31.1581	3.82643	34.2676	3.95395	29.9648	2.86028	30.2853	3.04302	27.0761	2.78043	38.7631	7.14057	38.9095	7.10522	37.8452	6.91087	35.0964	6.19348
26.578	Eicosane, 10-methyl-	296.344	054833-23-7	20.7303	2.77284	22.2307	2.73809	26.2991	3.21094	24.737	2.95998	19.7397	2.30297	20.1414	2.4735	17.9556	2.07179	20.8125	1.98665	18.9851	1.90759	20.6551	2.12106	22.8082	4.20152	25.6992	4.69289	26.6569	4.86778	22.4359	3.95928
26.676	Heneicosane	296.344	000629-94-7	23.0971	3.08941	22.2343	2.73854	20.0831	2.45201	21.7876	2.60707	20.6317	2.40703	22.9883	2.82313	21.397	2.46889	18.9647	1.81026	20.7194	2.08186	22.0306	2.26232	24.8958	4.58606	25.8658	4.72331	24.242	4.42681	24.7229	4.36287
26.815	Tridecane, 6-propyl-	226.266	055045-10-8	21.8587	2.92377	23.5877	2.90523	23.2964	2.84433	25.3485	3.03315	24.3697	2.84314	24.3091	2.98533	25.1007	2.89623	23.1233	2.20723	23.6619	2.37751	24.9651	2.56366	31.6335	5.82723	30.7266	5.61095	30.1095	5.49826	29.0419	5.12505
27.19	2-methyloctacosane	408.47	1000376-72-8	14.5138	1.94134	14.2096	1.75016	14.1816	1.73147	14.8704	1.77936	15.2648	1.78089	14.9058	1.83053	14.1532	1.63306	13.3766	1.27686	13.3659	1.34299	14.2087	1.45908	14.6336	2.69567	15.5414	2.838	16.4042	2.99554	15.4135	2.72003
27.357	Pentadecanoic acid, 14-methyl-, methyl ester	270.256	005129-60-2	60.5137	8.09419	61.1832	7.53576	64.0731	7.82288	69.6242	8.3311	64.2002	7.49003	60.7003	7.45442	63.1558	7.28721	54.6331	5.21498	56.1053	5.63738	63.4669	6.51738	66.0373	12.1648	72.1723	13.1793	72.0769	13.1619	71.3416	12.5897
27.51	Octacosane	394.454	000630-02-4															10.3448	0.987456	10.6446	1.06955	10.8299	1.11211
28.045	n-Hexadecanoic acid	256.24	000057-10-3	206.089	27.5661	211.929	26.1027	197.605	24.1262	191.118	22.8688	185.894	21.6876	172.643	21.2018	204.11	23.5511	187	17.85	182.853	18.3728	194.237	19.9461	205.374	37.8321	212.148	38.7401	214.906	39.2436	201.304	35.5243
28.663	3-Eicosene, (E)-	280.313	074685-33-9	12.9181	1.7279	12.9449	1.59439	13.2218	1.61428	12.7679	1.52778	16.9817	1.9812	18.342	2.25253	17.1265	1.97613	13.5375	1.29221	14.0197	1.40868	13.5958	1.39614	17.9222	3.30147	18.7369	3.42153	18.5716	3.39133	18.9917	3.35148
29.504	Pentacosane	352.68	000629-99-2	19.5311	2.61244	20.5543	2.53161	22.075	2.69521	19.6918	2.35629	24.2613	2.83049	22.5077	2.7641	23.1	2.66539	20.6493	1.97107	23.5002	2.36126	23.1703	2.37934	20.0143	3.68684	20.8551	3.80832	20.6554	3.77186	21.892	3.86329
29.99	Hexacosane	366.423	000630-01-3	18.7988	2.51449	19.263	2.37256	19.0235	2.32263	18.6874	2.2361	20.6095	2.40444	19.0693	2.34184	18.4544	2.12936	17.3593	1.65702	18.4443	1.85326	18.9606	1.94705	21.695	3.99645	22.089	4.03364	22.5616	4.11994	20.663	3.64641
30.212	Decane, 3,8-dimethyl-	170.203	017312-55-9	15.7376	2.10503	17.2306	2.12224	16.6912	2.03787	18.5674	2.22173	21.277	2.48231	21.608	2.65361	18.7266	2.16076	19.4642	1.85795	20.0458	2.01417	20.3382	2.08852	24.1002	4.4395	24.8226	4.53282	24.2457	4.42748	22.3643	3.94665
30.616	9,12-Octadecadienoic acid, methyl ester	294.256	000112-63-0	15.0989	2.0196	14.8599	1.83025	14.3749	1.75508	14.6296	1.75055	15.8946	1.85437	15.1749	1.86358	16.237	1.8735	15.328	1.46313	15.4843	1.55584	18.0998	1.85866	15.8608	2.92173	16.3539	2.98637	16.3102	2.97839	15.906	2.80693
30.72	10-Octadecenoic acid, methyl ester	296.272	013481-95-3															19.9653	1.90578	19.6279	1.97218	18.4528	1.89491
31.171	Methyl stearate	298.287	000112-61-8	30.572	4.08924	33.8248	4.1661	36.5056	4.45708	35.2159	4.21387	34.9326	4.07547	33.9868	4.17381	33.1362	3.8234	31.5374	3.01039	29.3901	2.95307	31.4654	3.23116	34.4555	6.34707	36.9407	6.7457	36.8593	6.73084	35.9629	6.34639
31.408	9,12-Octadecadienoic acid (Z,Z)-	280.24	000060-33-3	57.9051	7.74527	58.0528	7.1502	52.6603	6.42945	51.297	6.1381	61.7577	7.20506	57.2232	7.0274	50.5145	5.8286	46.7649	4.46392	48.5258	4.8758	50.8319	5.21991	75.2483	13.8615	74.0306	13.5186	75.158	13.7245	75.0271	13.2401
31.804	Octadecanoic acid	284.272	000057-11-4	51.0882	6.83345	50.2786	6.19267	53.2245	6.49834	47.7846	5.71781	54.6184	6.37215	46.9677	5.76797	54.9129	6.33611	47.3522	4.51998	48.7396	4.89728	49.9995	5.13443	53.2463	9.80853	55.0352	10.0499	54.9624	10.0366	50.3814	8.89084
32.165	9-Octadecenamide, (Z)-	281.272	000301-02-0	47.1071	6.30095	47.954	5.90635	55.1206	6.72984	52.8407	6.32281	53.362	6.22557	50.9107	6.25219	52.4481	6.05171	44.13	4.21241	50.3693	5.06103	48.2693	4.95675	50.0386	9.21764	59.5969	10.8829	59.5781	10.8795	51.5203	9.09181
34.257	Docosane, 11-decyl-	450.516	055401-55-3	15.7099	2.10133	15.632	1.92534	15.2426	1.86102	14.7994	1.77087	20.6893	2.41375	19.9806	2.45375	21.4762	2.47802	20.436	1.95071	18.186	1.8273	20.5805	2.11341	24.5261	4.51797	25.0939	4.58237	24.0124	4.38488	22.3935	3.95179
35.111	Heptacosane	380.73	000593-49-7	17.9754	2.40435	17.8564	2.19932	17.3838	2.12245	15.4056	1.8434	18.5972	2.16968	17.2375	2.11689	15.5759	1.79722	15.533	1.4827	16.5377	1.66168	17.138	1.75989	19.4529	3.58342	20.1208	3.67423	20.2058	3.68976	19.5583	3.45146
35.32	9-Octadecenamide, (Z)-	281.272	000301-02-0	81.5822	10.9123	84.2118	10.3721	83.3953	10.182	92.1247	11.0235	106.621	12.4391	107.099	13.1525	113.58	13.1054	84.3119	8.04796	101.784	10.2271	90.7741	9.32155	117.621	21.667	121.652	22.2147	120.121	21.9352	114.763	20.2522
35.778	Hexanedioic acid, bis(2-ethylhexyl) ester	370.308	000103-23-1	102.035	13.6479	106.497	13.1169	114.599	13.9918	134.668	16.1142	156.866	18.301	167.31	20.5468	190.422	21.9718	138.533	13.2236	161.488	16.2261	138.858	14.2592	168.655	31.0681	201.77	36.845	201.578	36.8099	209.784	37.0206
36.376	Phenol, 2,2'-methylenebis[6-(1,1-dimethylethyl)-4-methyl-	340.24	000119-47-1	58.1697	7.78066	58.1935	7.16753	54.1603	6.61259	49.4371	5.91555	26.2294	3.0601	25.5575	3.13864	27.4514	3.16747	27.2148	2.59778	28.8061	2.8944	27.0074	2.77338	34.7735	6.40564	31.0165	5.66388	31.1625	5.69055	27.7434	4.89589
37.14	6,9,12-Octadecatrienoic acid, methyl ester	292.24	002676-41-7	43.0957	5.76439	41.9946	5.17235	41.3875	5.05313	41.5791	4.97527	30.1403	3.51636	30.7467	3.77591	25.4605	2.93775	31.6169	3.01798	29.053	2.9192	29.4647	3.02572	40.7689	7.51007	42.9403	7.84128	42.7218	7.80137	54.4258	9.60456
37.411	9-Tricosene, (Z)-	322.36	027519-02-4	53.3098	7.13061	47.2158	5.81544	38.4125	4.6899	52.8016	6.31814	33.3477	3.89056	29.6584	3.64227	33.6456	3.88219	30.3353	2.89565	31.278	3.14277	31.3074	3.21494	35.7701	6.58924	40.0212	7.30821	38.713	7.06932	37.0975	6.54662
37.648	Hexadecanoic acid, 2-hydroxy-1-(hydroxymethyl)ethyl ester	330.277	023470-00-0	331.696	44.3669	367.556	45.2708	431.808	52.7207	394.398	47.193	475.211	55.4413	425.904	52.304	525.195	60.5995	559.737	53.4295	549.519	55.2148	629.957	64.6899	666.861	122.843	613.962	112.115	649.918	118.681	655.688	115.71
37.842	Methyl 20-methyl-heneicosanoate	354.35	1000336-47-4	33.7299	4.51164	33.3358	4.10588	41.2949	5.04182	31.0952	3.7208	55.7588	6.50519	47.6844	5.85598	57.7125	6.65913	61.8509	5.90395	62.8804	6.31813	70.2736	7.21636	71.2459	13.1242	62.6461	11.4397	74.1308	13.5369	67.3696	11.8888
40.212	9-Eicosyne	278.297	071899-38-2	17.6212	2.35698	17.9495	2.21079	19.8001	2.41745	17.1071	2.04701							18.7016	1.78515	18.996	1.90869	18.6837	1.91862	25.6973	4.73372	25.7313	4.69875	25.7588	4.70377	23.6819	4.17916
40.42	Tetracosane	338.391	000646-31-1	70.4796	9.42721	76.5966	9.43419	67.3447	8.22232	75.1467	8.99191	116.1	13.5449	91.0121	11.1769	95.7847	11.0521	74.2048	7.08318	91.5129	9.19508	88.3459	9.0722	80.3476	14.8009	78.5738	14.3483	87.5986	15.9963	77.6597	13.7047
40.761	Octadecanoic acid, 2-hydroxy-1-(hydroxymethyl)ethyl ester	358.308	000621-61-4	154.054	20.6059	178.547	21.9911	196.836	24.0323	128.417	15.3661	229.177	26.7373	204.107	25.0657	210.002	24.231	278.385	26.5731	267.291	26.857	327.1	33.5897	346.516	63.832	323.977	59.1609	333.015	60.8114	338.174	59.6778
41.824	13-Octadecenamide, (Z)-	281.272	003061-72-1	583.137	77.9993	599.017	73.7792	661.064	80.7113	681.033	81.4911	611.738	71.3695	654.969	80.4348	113.15	13.0557	71.9263	6.86569	68.8044	6.91336	62.3565	6.40336	128.273	23.6292	155.981	28.4835	153.404	28.0128	133.733	23.5999
43.227	1-Hexacosene	364.407	018835-33-1	26.3489	3.52438	24.785	3.0527	24.4243	2.98204	23.0619	2.75955	190.456	22.2198	181.139	22.2451	174.35	20.1173	135.476	12.9318	162.922	16.3701	144.492	14.8378	126.959	23.3872	123.766	22.6008	122.442	22.3589	114.346	20.1787
47.07	Vitamin E	430.381	000059-02-9									28.1464	3.28375	31.335	3.84816	34.9012	4.02706	38.8618	3.70953	35.8347	3.60062	38.7714	3.98142	197.759	36.4293	206.224	37.6583	193.493	35.3334	197.302	34.8179
原始编号	实验室编号
S1	z1
	z2
	z3
S2	z4
	z5
	z6
S3	z7
	z8
	z9
S4	z10
	z11
	z12
