# Supplementary material for: Morphological and physiological insights into coordination of anthocyanin deposition and cuticle formation in leaf development of Rosa chinensis
Source: Research Square preprint supplement (doi:10.21203/rs.3.rs-7371935/v1), 2025-10-27
Supplement: Supplementary file 2 [file fb62995816bc98604ad84c79.xlsx]

## Sheet: Sheet1
Supplement Table 2: The raw data in anthocyanins
Sample Name	Sample		PelC		CC		PeoC		DC		Pt		Mv
	Quality (g)	Dilution volume (mL)	Concentration（µg/mL）	Sample content（µg/g）	Concentration（µg/mL）	Sample content（µg/g）	Concentration（µg/mL）	Sample content（µg/g）	Concentration（µg/mL）	Sample content（µg/g）	Concentration（µg/mL）	Sample content（µg/g）	Concentration（µg/mL）	Sample content（µg/g）
S1-1	0.511	10	0.01331	0.26047	33.278	651.233	0.0013375	0.0261742	0.01315	0.257339	0.0005746	0.0112446	0.000648155	0.0126841
S1-2	0.5168	10	0.01384	0.267802	33.4729	647.696	0.001048	0.0202786	0.01223	0.236649	0.0005488	0.0106192	0.000608958	0.0117832
S1-3	0.5122	10	0.01199	0.234088	32.1408	627.504	0.001238	0.0241702	0.01274	0.248731	0.00053	0.0103475	0.000637189	0.0124402
S2-1	0.5154	10	0.006505	0.126213	23.6473	458.815	0.021245	0.412204	0.0162433	0.31516	0.001072	0.0207994	0.0181684	0.352511
S2-1	0.5154	10	0.006776	0.131471	23.4264	454.528	0.021105	0.409488	0.0149333	0.289743	0.0011622	0.0225495	0.00183341	0.0355725
S2-1	0.5154	10	0.006213	0.120547	21.7823	422.629	0.02	0.388048	0.0147033	0.28528	0.0010574	0.0205161	0.00183574	0.0356178
S2-2	0.5059	10	0.006293	0.124392	22.4516	443.796	0.020555	0.406306	0.0146033	0.28866	0.0011626	0.0229808	0.00174988	0.0345894
S2-3	0.512	10	0.006726	0.131367	22.3931	437.366	0.01955	0.381836	0.0135267	0.264193	0.001109	0.0216602	0.00164629	0.032154
S3-1	0.5044	10	0.006076	0.12046	10.8877	215.854	0.0007574	0.0150159	0.0112567	0.223169	0.0003132	0.00620936	0.00325711	0.0645739
S3-2	0.5049	10	0.006145	0.121707	10.0526	199.101	0.0009475	0.0187661	0.0105067	0.208094	0.000234	0.00463458	0.00282221	0.0558963
S3-2	0.5134	10	0.006717	0.130834	11.3523	221.12	0.00059	0.011492	0.0111467	0.217115	0.00023436	0.00456486	0.00262249	0.0510808
S4-1	0.5165	10	0.006877	0.133146	1.27066	24.6013	0.006615	0.128074	0.00974333	0.188641	0.00019302	0.00373708	0.00129164	0.0250076
S4-2	0.5171	10	0.006521	0.126107	1.05069	20.3188	0.008385	0.162154	0.00976667	0.188874	0.0002066	0.00399536	0.00130564	0.0252493
S4-2	0.5171	10	0.006667	0.128931	1.03444	20.0047	0.007025	0.135854	0.0116	0.224328	0.00019782	0.00382557	0.00119598	0.0231287
S4-2	0.5171	10	0.006657	0.128737	1.15564	22.3484	0.00821	0.15877	0.0107633	0.208148	0.00019182	0.00370953	0.00132291	0.0255832
S4-3	0.5107	10	0.006057	0.118602	1.30965	25.6442	0.006695	0.131095	0.00999333	0.195679	0.00018616	0.00364519	0.00128791	0.0252185
